# Supplementary material for: Two months of disdrometer data in the Paris area
Source: Copernicus journal article supplement (doi:10.5194/essd-2017-142), 2018-01-02
Supplement: Supplementary file [file essd-2017-142-AC1-supplement.pdf]

First the authors would like to thank the reviewers for their suggestions and careful reading that helped improve the manuscript. Hopefully the changes implemented will satisfy their requirements!

The manuscript presents a dataset of drop sizes and velocity for precipitation collected by three disdrometers in January and February 2016 in the Paris area. Additional information about the temperature is also included. The measuring principles of the two types of disdrometers used in this study are described as well as the set-up and the provided datasets. Along with the data, a set of python routines is provided and briefly described for easy data usage. Unfortunately, I wasn't able to test those scripts because it requires python3.

The manuscript fits in the scope of ESSD, but some issues need to be addressed. I recommend taking the following suggestions and comments into account:

1. The authors present a dataset for January and February 2016 obtained in the framework of TARANIS. This is a rather limited dataset of only two month. The authors cite their article Gires et al. (2017b) in which they use another two month data set from May and June 2016 also obtained in the framework of TARANIS with the same set-up. Therefore, it seems that there is an actual dataset of at least 6 month. Is there a reason, why the authors only provide the data for January and February 2016 in this manuscript and not the whole dataset? According to Gires et al. (2017b) there was a lot of precipitation in May and June 2016 in the Paris area, which makes this dataset even more interesting. I would suggest providing the whole dataset.

This issue was also pointed out by the other reviewer. As mentioned in the title, the paper dataset contains two months of data. It corresponds to two months of data with a cumulative depth consistent with the local climatological average. No extreme events were recorded, i.e. the maximums observed at both 5 min and 30 min have return periods smaller than one month. Such "common" events are notably relevant for urban water managers because they correspond to ones for which they should be able to fully decontaminate storm water before release in the natural environment. Furthermore over this range of value the devices are expected to be reliable. Following the reviewers remark, this point was clarified in the presentation of the measurement period. Moreover the devices and additional ones are still operating and collecting data. Hence some additional data will be made available through our website (<https://hmco.enpc.fr/portfolio-archive/taranis-observatory/>) which already contains links to the calendars for the various past and ongoing (daily updates) measurement campaigns in which the devices were used. Following the reviewers remarks, this was clarified at the end of section 4.

2. The links in the html files (Calendar\_Carnot\_1.html, Calendar\_R\_30\_sec\_Carnot\_1.html and Calendar\_R\_5\_min\_Carnot\_1.html) didn't work for me. When clicking on a specific date, an error message appeared stating that the file could not be found. Please check the links!

Actually, I do not really understand why because I downloaded the file Calendars\_batiment\_Carnot\_1.zip from zenodo, unzipped it and it worked... It might be that your file Calendar\_R\_30\_sec\_Carnot\_1.html somehow was not located in the same folder as the folders "Quicklooks", "Data\_5\_min" and "Data\_30\_sec". Because indeed the links are "relative" and assume this. Following your remark, this was clarified in the manuscript (subsection 3.1). Please let me know if this was that.

3. In the introduction the authors describe very briefly for which type of studies the

dataset could be useful. I would recommend adding a section at the end of the manuscript that describes the usefulness of the dataset and possibilities for its application in more detail.

There are numerous applications of the DSD as mentioned in the introduction. Authors do not believe that it is the purpose of this data paper to go into too much details and that citing relevant papers is sufficient in this context. Nevertheless the reviewer is right that an overall explanation on the fact that all the discussed quantities are basically derived as integrals of the DSD was missing and is now added for clarification.

Specific comments:

- P.1, L.3: disdrometers measurements → disdrometer measurements
- P.1, L.8: along with more aggregated one such rain rate → along with more aggregated ones such as rain rate
- P.1, L.20: such the 2D Video → such as the 2D Video
- P.2, L.2: equivolimic → equivolumic
- P.2, L.21: that do not work on the same principle → operating on different principles
- P.2, L.30: is not the same → is different
- P.3, L.5: Actually authors found possible → Actually the authors could
- P.3, L.11: devices → device
- P.3, L.11: by authors → by the authors
- P.3, L.18: maide → made
- P.3, L.25: access the raw data → access to the raw data
- P.3, L.30: This sentence is confusing. Please rephrase it.
- P.4, L.3: so it user are → so the users are
- P.4, L.5: What is the resolution of the PWS100 temperature observations?
- P.4, L.8: the the → the
- P.4, L.20: total depth are → total depths are
- P.4, L.22: West from disdrometer . . . South from disdrometer → West of the disdrometer. . . South of the disdrometer

This was corrected. Thank you for your careful reading !

- P. 4, 5 and 6 (description of the data base content): It would be beneficial if the type of data that the folders contain could be added. E.g. P4, L.32: Each folder contains the files of raw data for its disdrometer.

Actually, the files are described in the corresponding sub-section. You would like to add some information in the database summary structure ?

- P.6, L.7: Is it supposed to be Calendars\_batiment\_Carnot\_1 according to the name in the database?

Indeed there is a mismatch between the paper and the data base. It was corrected in the data base.

- P.6, L.27: Lhermitte et al., 1988 is missing in the references.
- P.7, L5: semi column → semicolon
- P.7, L.8: I guess the name of the file is R\_5\_min\_Carnot\_1\_... in this case?
- P.7, L:11: file → files

This was corrected.

- P.7, L.13: As far as I see, the names of the files in the Daily\_data\_csv folder in the database only contain the day, not start and end time.

Indeed, the format was corrected in the text.

- P.8, L.1: There is two times “1st size class-2nd velocity class” in the enumeration
- P.8, L.4: These files are text file → These files are text files
- P.9, L.6: each of the day → each day
- P.9, L.18: The routine is called “extracting\_one\_event\_Carnot\_1” in the python script.

This was corrected. Again, thank you for your careful reading !

I also checked the descriptions in Read\_me\_v1.txt:

Under point 2) Tools:

- It is v3 and not v2 of the script Tools\_data\_base\_use\_v2.py
- The routine is called “extracting\_one\_event\_Carnot\_1” in the python script
- A description of the routine exporting\_full\_matrix\_and\_T.py is missing

This was corrected.

Last sentence: Where can the script Tools\_overall\_management\_”Campaign”.py be found? I didn’t see it in the python folder.

Indeed it was a sentence remaining from the files I used to actually collected the data. The function “Generation\_daily\_data\_python\_Carnot\_1” was added to the file “Tools\_data\_base\_use\_v3.py”; This was corrected in the read\_me file. As a consequence at the final stage of the review, I will also update the database with a new doi.
